# Supplementary material for: Flower diversity and bee reproduction in an arid ecosystem
Source: PeerJ journal article supplement (doi:10.7717/peerj.2250), 2016-07-26

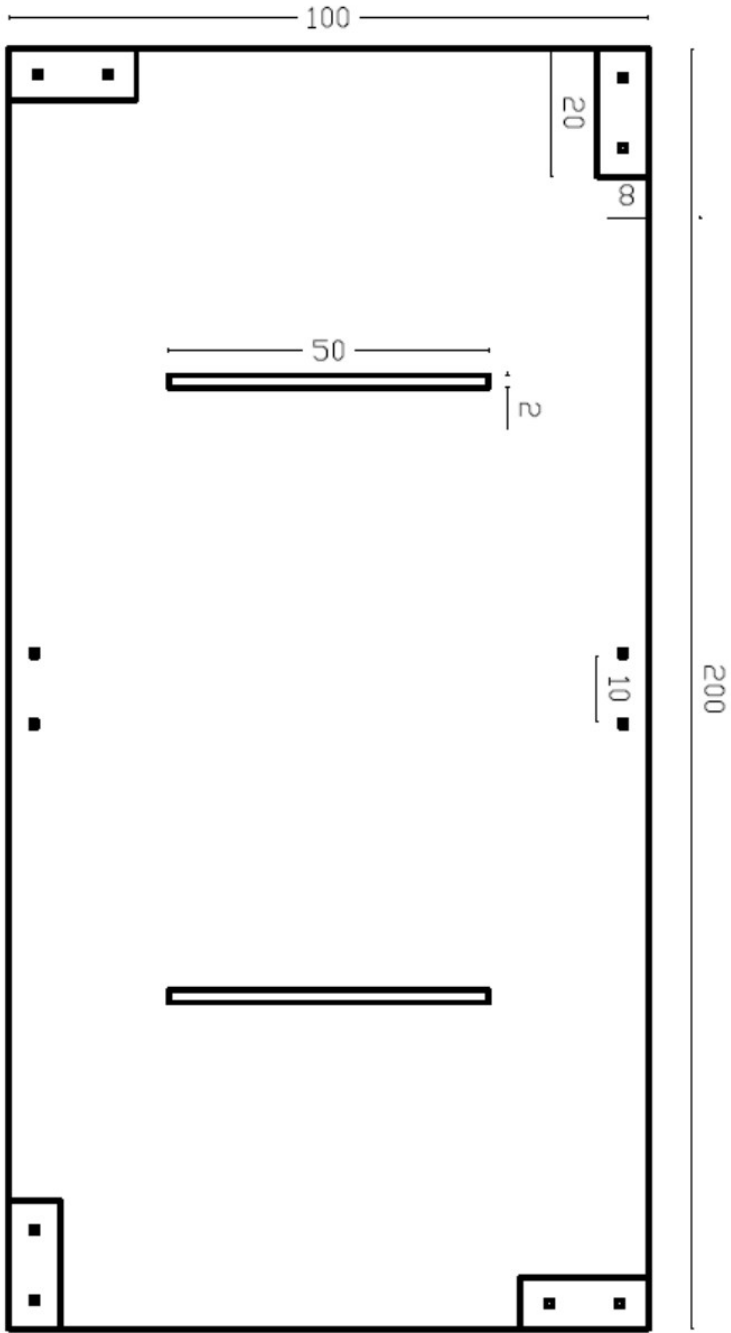

Supplement: figS1.pdf [file figS1.pdf]
